# Supplementary material
Source: publisher site journal article supplement (https://www.spandidos-publications.com/1005/downloadSupplementary)
Supplement: Supplementary file 1 [file downloadSupplementary]

Figure S1. Prognostic analysis of 13 biliary tract cancer patients with recommendation of targeted agent in the chemotherapy group. (A and B) Kaplan-Meier statistical analyses of the progression-free survival (PFS) and overall survival (OS) of 13 patients with recommendation of a targeted agent who underwent conventional chemotherapy.

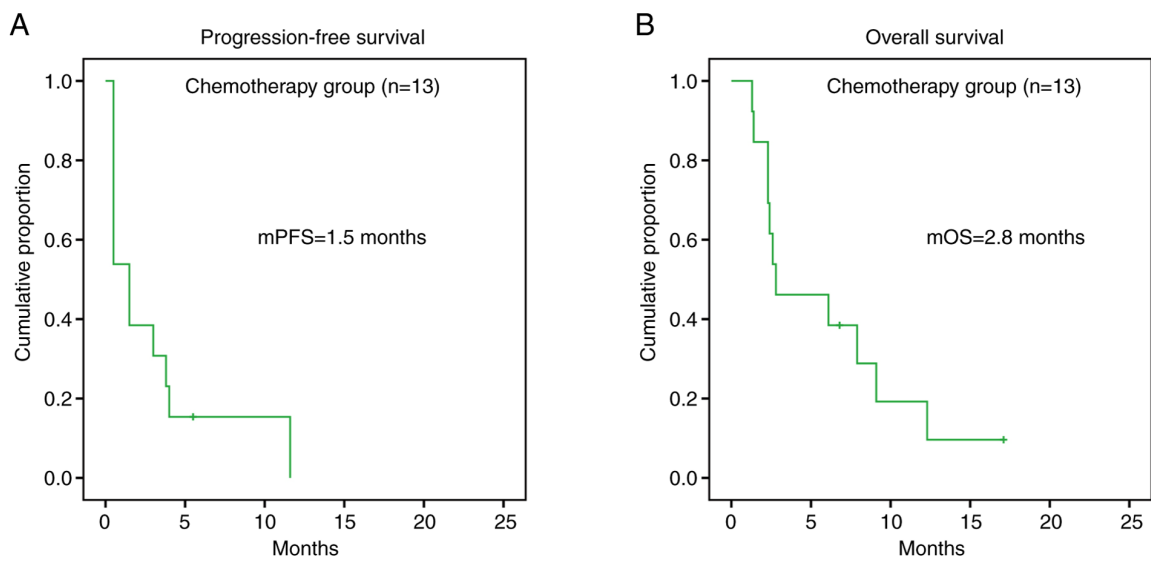

Figure S2. Imaging findings of the representative case of the patient with gallbladder carcinoma who received targeted therapy. (A) Result of the magnetic resonance cholangiopancreatography (MRCP) was obtained on December 23, 2014 prior to the study. (B) The liver enhanced magnetic resonance scan was achieved at the first review on April 21, 2015. (C and D) The results of computed tomography (CT) on this gallbladder carcinoma patient was obtained after 4 and 6 months of receiving the precision therapy.

**A** Magnetic resonance cholangiopancreatography (MRCP)

2014.12.23  
(Prior to surgery)

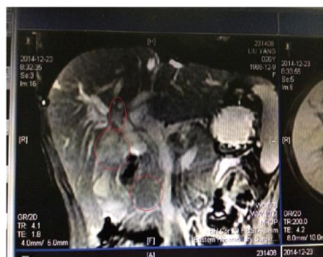

**C**

Computed tomography (CT)

2015.05.29  
(4 months on study)

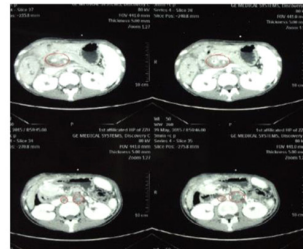

**B**

MR liver enhanced

2015.04.21  
(3 months on study)

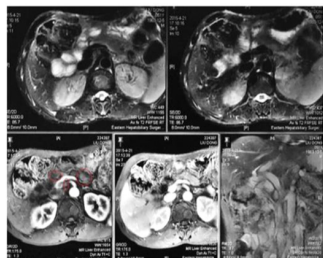

**D**

Computed tomography (CT)

2015.07.30  
(6 months on study)

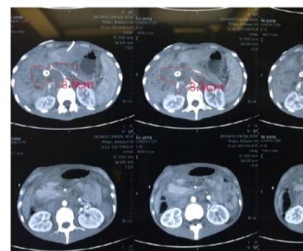

Figure S3. Prognostic analysis of 8 gallbladder carcinoma patients carrying ERBB pathway mutations in the targeted therapy group and the chemotherapy group. Among the 8 gallbladder carcinoma patients, 3 patients received targeted therapy, while 5 patients underwent conventional chemotherapy. (A and B) Kaplan-Meier statistical analyses of the progression-free survival (PFS) with  $P=0.122$  and overall survival (OS) with  $P=0.051$  of the two groups. *ERBB*, Erb-B2 receptor tyrosine kinase.

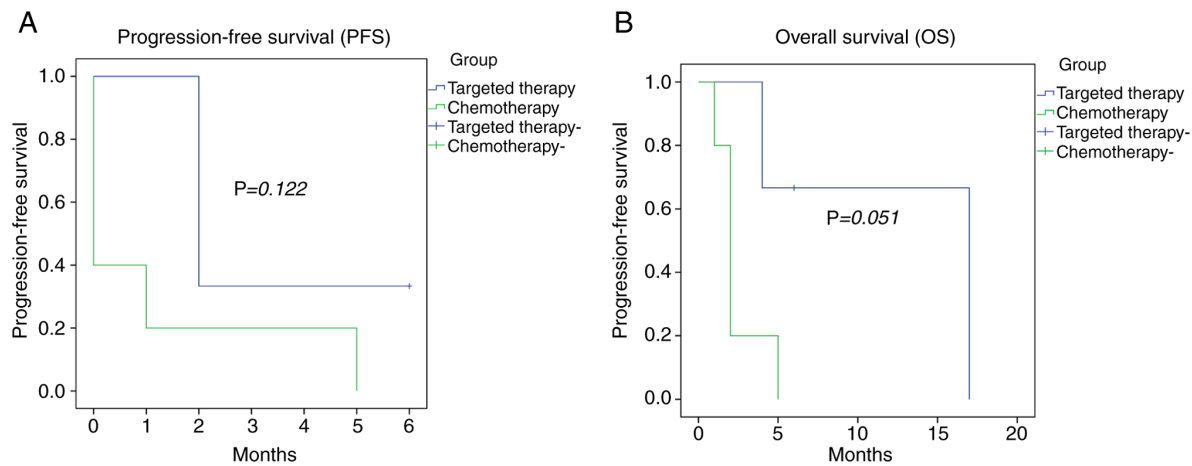

Table SI. Information in regards to the targetable altered genes corresponding to the biological agents.

| Mutated genes        | Recommended drugs                                                                                          |
|----------------------|------------------------------------------------------------------------------------------------------------|
| <i>ATM</i>           | Daunorubicin, olaparib, rapamycin                                                                          |
| <i>BRAF</i>          | Sorafenib, trametinib                                                                                      |
| <i>CDK6</i>          | Palbociclib                                                                                                |
| <i>CDKN2A</i>        | Palbociclib                                                                                                |
| <i>ERBB2</i>         | Trastuzumab, lapatinib                                                                                     |
| <i>ERBB3</i>         | Trastuzumab, lapatinib                                                                                     |
| <i>ERBB4</i>         | Lapatinib, axitinib                                                                                        |
| <i>FGFR3</i>         | Pazopanib                                                                                                  |
| <i>FLT3</i>          | Rapamycin, sorafenib, sunitinib                                                                            |
| <i>FLT4</i>          | Pazopanib, sunitinib                                                                                       |
| <i>KRAS</i>          | Cetuximab (invalid), panitumumab (invalid), gefitinib (invalid), erlotinib (invalid), everolimus (invalid) |
| <i>MAP2K1 (MEK1)</i> | Trametinib                                                                                                 |
| <i>MET</i>           | Crizotinib                                                                                                 |
| <i>PDGFRA</i>        | Imatinib, bevacizumab                                                                                      |
| <i>PDGFRB</i>        | Rapamycin                                                                                                  |
| <i>PIK3CA</i>        | Everolimus, temsirolimus                                                                                   |
| <i>PIK3R2</i>        | Cabozantinib                                                                                               |
| <i>PTCH1</i>         | Vismodegib                                                                                                 |
| <i>RET</i>           | Regorafenib                                                                                                |
| <i>SRC</i>           | Dasatinib                                                                                                  |
| <i>VHL</i>           | Sorafenib, sunitinib, bevacizumab                                                                          |

Table SII. Follow-up of the 49 patients with biliary tract cancers.

| Patient ID | Sex | Age (years) | Cancer type           | OS (months) | PFS (months) |
|------------|-----|-------------|-----------------------|-------------|--------------|
| BTC-001    | M   | 64          | Gallbladder carcinoma | 2.8         | 0.5          |
| BTC-002    | F   | 46          | Cholangiocarcinomas   | 3.2         | 1.0          |
| BTC-003    | F   | 66          | Cholangiocarcinomas   | 6.1         | 3.8          |
| BTC-004    | F   | 55          | Gallbladder carcinoma | 7.9         | 7.5          |
| BTC-005    | M   | 46          | Cholangiocarcinomas   | 5.6         | 5.0          |
| BTC-006    | F   | 51          | Gallbladder carcinoma | 6.8         | 5.5          |
| BTC-007    | M   | 59          | Gallbladder carcinoma | 6.9         | 6.5          |
| BTC-008    | M   | 60          | Cholangiocarcinomas   | 40.8        | 40.5         |
| BTC-009    | M   | 58          | Cholangiocarcinomas   | 1.4         | 0.5          |
| BTC-010    | M   | 58          | Cholangiocarcinomas   | 24.8        | 20.5         |
| BTC-011    | F   | 59          | Cholangiocarcinomas   | 8.9         | 4.5          |
| BTC-012    | M   | 60          | Cholangiocarcinomas   | 4.7         | 2.5          |
| BTC-013    | M   | 60          | Gallbladder carcinoma | 21.9        | 21.0         |
| BTC-014    | M   | 72          | Cholangiocarcinomas   | 18.8        | 13.5         |
| BTC-015    | M   | 67          | Cholangiocarcinomas   | 9.9         | 3.0          |
| BTC-016    | F   | 63          | Gallbladder carcinoma | 2.3         | 1.5          |
| BTC-017    | M   | 35          | Cholangiocarcinomas   | 2.4         | 0.5          |
| BTC-018    | M   | 60          | Gallbladder carcinoma | 17.9        | 2.5          |
| BTC-019    | M   | 46          | Gallbladder carcinoma | 2.6         | 0.5          |
| BTC-020    | F   | 71          | Gallbladder carcinoma | 4.8         | 2.5          |
| BTC-021    | M   | 66          | Cholangiocarcinomas   | 2.3         | 0.5          |
| BTC-022    | F   | 61          | Cholangiocarcinomas   | 17.1        | 11.6         |
| BTC-023    | M   | 58          | Gallbladder carcinoma | 1.3         | 0.5          |
| BTC-024    | F   | 38          | Cholangiocarcinomas   | 5.9         | 0.5          |
| BTC-025    | M   | 51          | Cholangiocarcinomas   | 12.3        | 1.5          |
| BTC-026    | M   | 65          | Cholangiocarcinomas   | 12.9        | 6.5          |
| BTC-027    | M   | 68          | Cholangiocarcinomas   | 14.8        | 14.0         |
| BTC-028    | M   | 55          | Cholangiocarcinomas   | 9.7         | 5.0          |
| BTC-029    | M   | 38          | Cholangiocarcinomas   | 22.5        | 21.5         |
| BTC-030    | F   | 66          | Gallbladder carcinoma | 5.6         | 5.0          |
| BTC-031    | F   | 65          | Gallbladder carcinoma | 4.1         | 1.0          |
| BTC-032    | M   | 53          | Gallbladder carcinoma | 9.6         | 4.5          |
| BTC-033    | M   | 61          | Cholangiocarcinomas   | 24.8        | 23.5         |
| BTC-034    | M   | 62          | Cholangiocarcinomas   | 15.8        | 7.5          |
| BTC-035    | M   | 58          | Gallbladder carcinoma | 15.5        | 6.0          |
| BTC-036    | M   | 65          | Gallbladder carcinoma | 1.7         | 0.5          |
| BTC-037    | F   | 64          | Gallbladder carcinoma | 18.5        | 17.5         |
| BTC-038    | F   | 56          | Cholangiocarcinomas   | 21.8        | 12.0         |
| BTC-039    | F   | 52          | Gallbladder carcinoma | 6.5         | 1.9          |
| BTC-040    | M   | 63          | Cholangiocarcinomas   | 7.8         | 3.5          |
| BTC-041    | F   | 55          | Gallbladder carcinoma | 13.2        | 2.8          |
| BTC-042    | M   | 53          | Cholangiocarcinomas   | 2.3         | 0.5          |
| BTC-043    | F   | 56          | Gallbladder carcinoma | 5.7         | 3.5          |
| BTC-044    | M   | 65          | Cholangiocarcinomas   | 7.9         | 4.0          |
| BTC-045    | M   | 46          | Cholangiocarcinomas   | 18.4        | 2.9          |
| BTC-046    | M   | 52          | Cholangiocarcinomas   | 13.3        | 12.6         |
| BTC-047    | M   | 55          | Gallbladder carcinoma | 5.2         | 5.0          |
| BTC-048    | F   | 26          | Gallbladder carcinoma | 12.9        | 6.5          |
| BTC-049    | M   | 64          | Cholangiocarcinomas   | 9.1         | 3.0          |

OS, overall survival; PFS, progression-free survival; M, male; F, female.

Table SIII. Gene list of the targeted next generation sequencing (NGS).

| Gene mutation |          |         |         |         |          |        |        |           |         |         |           |        |  |
|---------------|----------|---------|---------|---------|----------|--------|--------|-----------|---------|---------|-----------|--------|--|
| ABL1          | BCL2L2   | CDK4    | DDR2    | FAS     | GATA4    | INPP4B | MAGI2  | NF2       | PIK3CG  | RBM10   | SOX9      | TSC2   |  |
| ABL2          | BCL6     | CDK6    | DICER1  | FAT1    | GATA6    | IRF2   | MAP2K1 | NFE2L2    | PIK3R1  | RET     | SPEN      | TSHR   |  |
| ACVR1B        | BCOR     | CDK8    | DNMT3A  | FBXW7   | GID4     | IRF4   | MAP2K2 | NFKBIA    | PIK3R2  | RICTOR  | SPOP      | TYK2   |  |
| ACVR2A        | BCORL1   | CDKN1A  | DOTIL   | FGF10   | GLI1     | IRS2   | MAP2K4 | NKX2-1    | PKD2    | RNF43   | SPTA1     | U2AF1  |  |
| ADAM29        | BIRC5    | CDKN1B  | EGF     | FGF14   | GLI2     | ITK    | MAP3K1 | NOTCH1    | PLA2G1B | ROCK1   | SRC       | VEGFA  |  |
| AKT1          | BLK      | CDKN2A  | EGFR    | FGF19   | GLI3     | JAK1   | MAP4K5 | NOTCH2    | PLCG2   | ROCK2   | SRMS      | VHL    |  |
| AKT2          | BLM      | CDKN2B  | EP300   | FGF23   | GNAI1    | JAK2   | MCL1   | NOTCH3    | PMS2    | ROSI    | STAG2     | WEE1   |  |
| AKT3          | BMX      | CDKN2C  | EPHA2   | FGF3    | GNAI3    | JAK3   | MDM2   | NPM1      | POLD1   | RPTOR   | STAT3     | WEE2   |  |
| ALK           | BRAF     | CEBPA   | EPHA3   | FGF4    | GNAQ     | JUN    | MDM4   | NRAS      | POLE    | RUNX1   | STAT4     | WISP3  |  |
| AMER1         | BRCA1    | CHD2    | EPHA5   | FGF6    | GNAS     | KAT6A  | MED12  | NRG1      | PPP2R1A | RUNX1T1 | STK11     | WT1    |  |
| APC           | BRCA2    | CHD4    | EPHA7   | FGFR1   | GPR124   | KDM5A  | MEF2B  | NRG3      | PRDM1   | RXRA    | STK24     | XIAP   |  |
| AR            | BRD4     | CHEK1   | EPHB1   | FGFR2   | GRIN2A   | KDM5C  | MEN1   | NSD1      | PREX2   | SDHA    | SUFU      | XPO1   |  |
| ARAF          | BRIP1    | CHEK2   | ERBB2   | FGFR3   | GRM3     | KDM6A  | MET    | NTRK1     | PRKARIA | SDHB    | SYK       | YES1   |  |
| ARFRP1        | BTG1     | CIC     | ERBB3   | FGFR4   | GSK3B    | KDR    | MITF   | NTRK2     | PRKCI   | SDHC    | TAF1      | ZBTB2  |  |
| ARID1A        | BTK      | CRBN    | ERBB4   | FGR     | H3F3A    | KEAP1  | MLH1   | NTRK3     | PRKDC   | SDHD    | TBX3      | ZNF217 |  |
| ARID1B        | C11orf30 | CREBBP  | ERCC1   | FGF     | HCK      | KEL    | MPL    | NUP93     | PRSS8   | SETD2   | TCF7L2    | ZNF703 |  |
| ARID2         | CARD11   | CRKL    | ERG     | FLCN    | HGF      | KIT    | MRE11A | PAK3      | PTCHI   | SF3B1   | TEK       | ZNF750 |  |
| ASXL1         | CBFB     | CRLF2   | ERRFI1  | FLT1    | HNF1A    | KLHL6  | MS4A1  | PALB2     | P TEN   | SIK1    | TEI2      |        |  |
| ATM           | CBL      | CSF1R   | ESR1    | FLT3    | HRAS     | KMT2A  | MSH2   | PARK2     | PTK2    | SLIT2   | TGFBFR 1  |        |  |
| ATR           | CCND1    | CSK     | EZH2    | FLT4    | HSD3B1   | KMT2C  | MSH6   | PAX5      | PTK6    | SMAD2   | TGFBFR 2  |        |  |
| ATRX          | CCND2    | CSNK1A1 | FAM135B | FOXL2   | HSP90AA1 | KMT2D  | MST1R  | PBRM1     | PTPN11  | SMAD3   | TIE1      |        |  |
| AURKA         | CCND3    | CTCF    | FAM46C  | FOXP1   | IDH1     | KRAS   | MTOR   | PDCD1LG 2 | QKI     | SMAD4   | TNFAIP 3  |        |  |
| AURKB         | CCNE1    | CTNNA1  | FANCA   | FRS2    | IDH2     | LCK    | MUTYH  | PDGFRA    | RAC1    | SMARCA4 | TNFRSF 14 |        |  |
| AXIN1         | CD274    | CTNNB1  | FANCC   | FUBP1   | IGF1R    | LIMK1  | MYC    | PDGFRB    | RAD50   | SMARCB1 | TNFSF1 1  |        |  |
| AXL           | CD79A    | CUL3    | FANCD2  | FYN     | IGF2     | LMO1   | MYCL   | PDK1      | RAD51   | SMO     | TNK2      |        |  |
| BAP1          | CD79B    | CXCR4   | FANCE   | GABRA 6 | IKBKE    | LRP1   | MYCN   | PIK3C2B   | RAF1    | SNCAIP  | TOPI      |        |  |
| BARD1         | CDC73    | CYLD    | FANCF   | GATA1   | IKZF1    | LRP1B  | MYD88  | PIK3CA    | RANBP2  | SOCSI   | TOP2A     |        |  |
| BCL2          | CDH1     | DAXX    | FANCG   | GATA2   | IL7R     | LYN    | NEK11  | PIK3CB    | RARA    | SOX10   | TP53      |        |  |
| BCL2L1        | CDK12    | DDR1    | FANCL   | GATA3   | INHBA    | LZTR1  | NF1    | PIK3CD    | RBI     | SOX2    | TSCI      |        |  |
| Gene fusion   |          |         |         |         |          |        |        |           |         |         |           |        |  |
| ALK           | BCR      | BRAF    | BRCA1   | BRCA2   | BRD4     | ETV1   | ETV4   | ETV5      | ETV6    | FGFR1   | FGFR2     | FGFR3  |  |
| MYB           | NOTCH2   | NTRK1   | NTRK2   | PDGFRA  | RAF1     | RARA   | RET    | ROSI      | TMPRSS2 | MET     | DDR2      |        |  |
